# Supplementary material for: Exploring the biodiversity of Bifidobacterium asteroides among honey bee microbiomes
Source: PubMed Central journal article supplement (PMC10092428; doi:10.1111/1462-2920.16223), 2022-10-03
Supplement: EMI-24-5666-s001.pdf [file EMI-24-5666-s001.pdf]

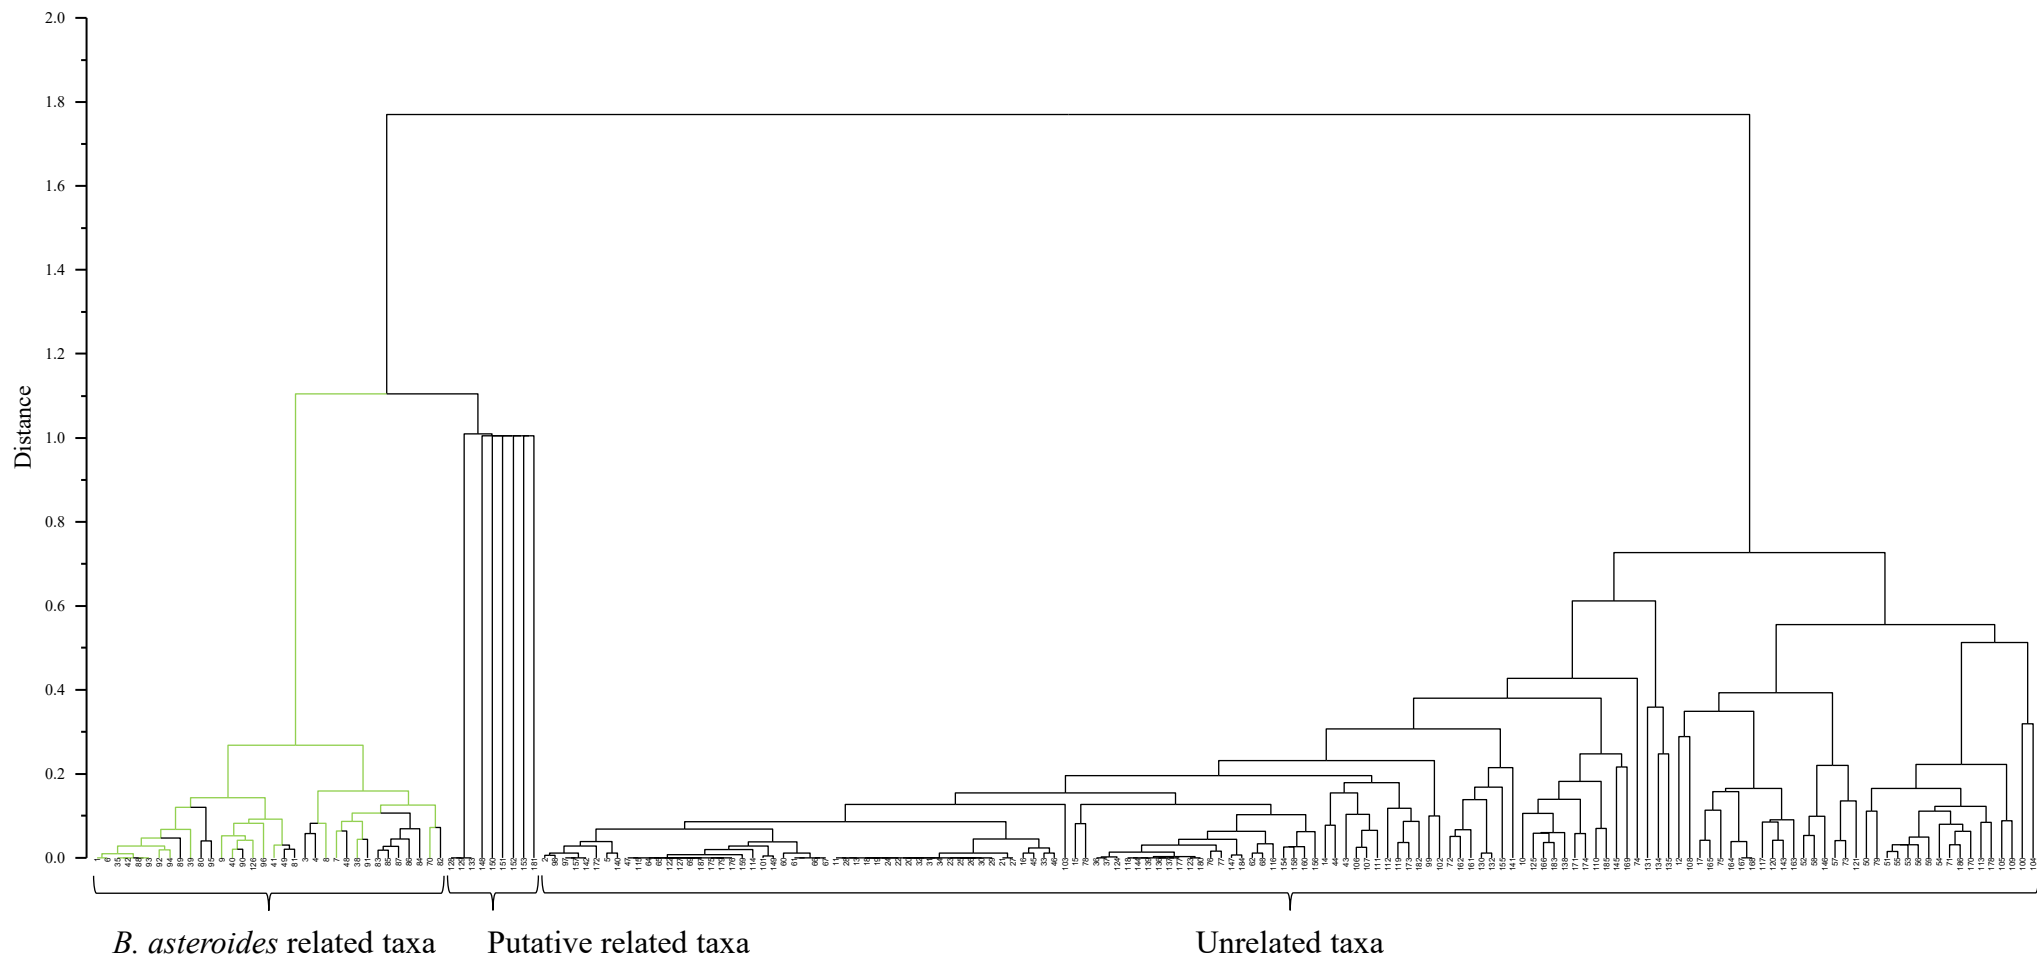

- Bifidobacteria classified as *B. asteroides* in NCBI
- Bifidobacteria not classified at the species level in NCBI

**Figure S1**
