# Supplementary material for: Exploring the biodiversity of Bifidobacterium asteroides among honey bee microbiomes
Source: PubMed Central journal article supplement (PMC10092428; doi:10.1111/1462-2920.16223), 2022-10-03
Supplement: EMI-24-5666-s003.pdf [file EMI-24-5666-s003.pdf]

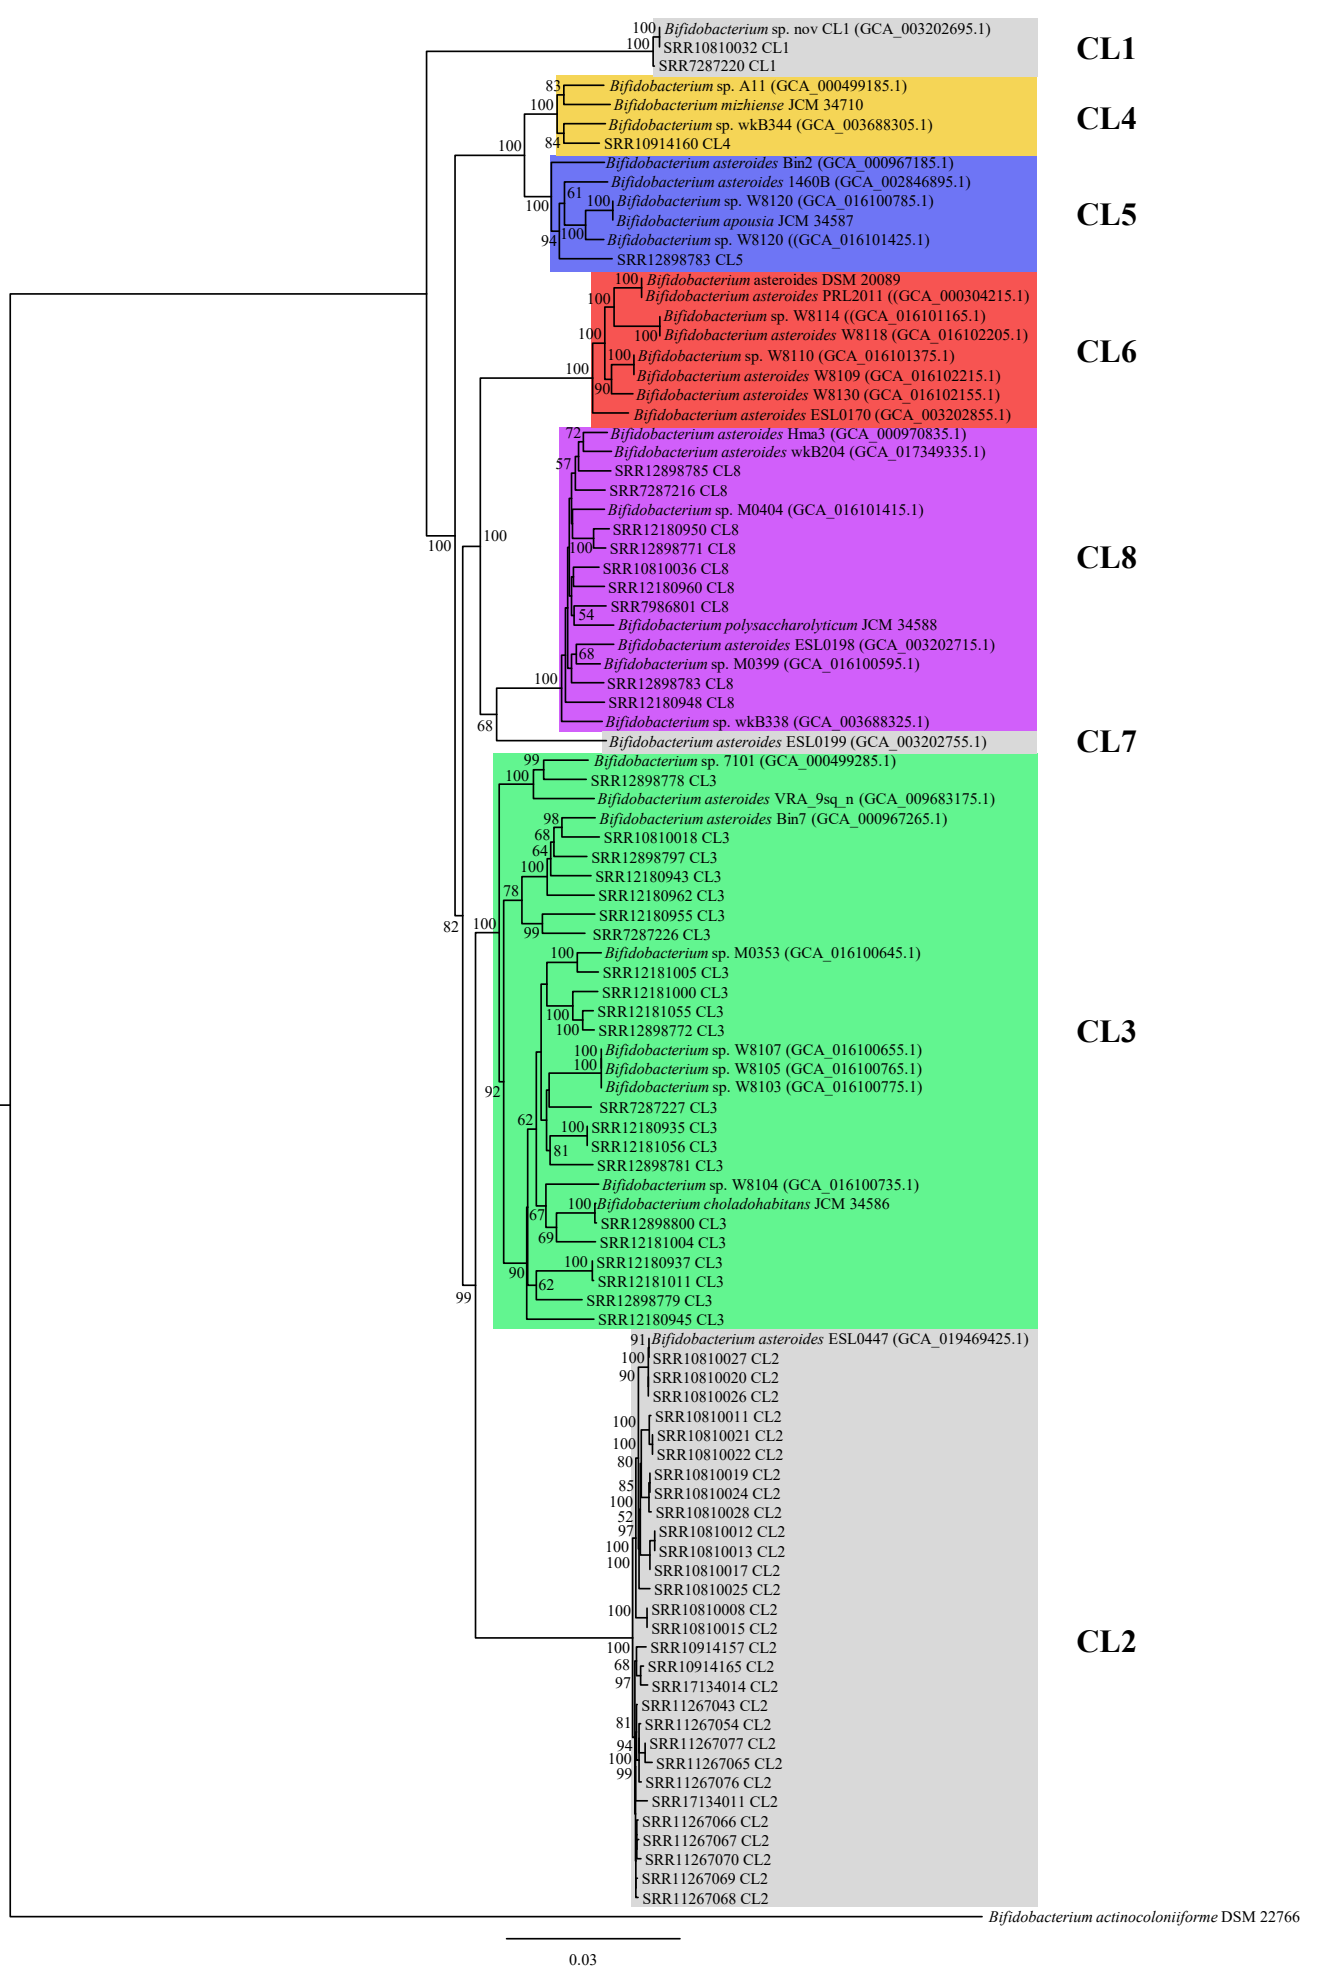

■ *Bifidobacterium asteroides* taxon    
 ■ *Bifidobacterium choladohabitans* taxon    
 ■ *Bifidobacterium polysaccharolyticum* taxon  
■ *Bifidobacterium apousia* taxon    
 ■ *Bifidobacterium mizhiense* taxon    
 ■ *Bifidobacterium asteroides* related taxa

**Figure S2**
